# Supplementary material for: Adverse Childhood Experiences Are Associated with Reduced Psychological Resilience in Youth: A Systematic Review and Meta-Analysis
Source: MDPI journal article supplement (doi:10.3390/children9010027), 2021-12-31

**Figure S1.** Funnel plot showing low publication bias for meta-analysis of the correlation between ACE and resilience.

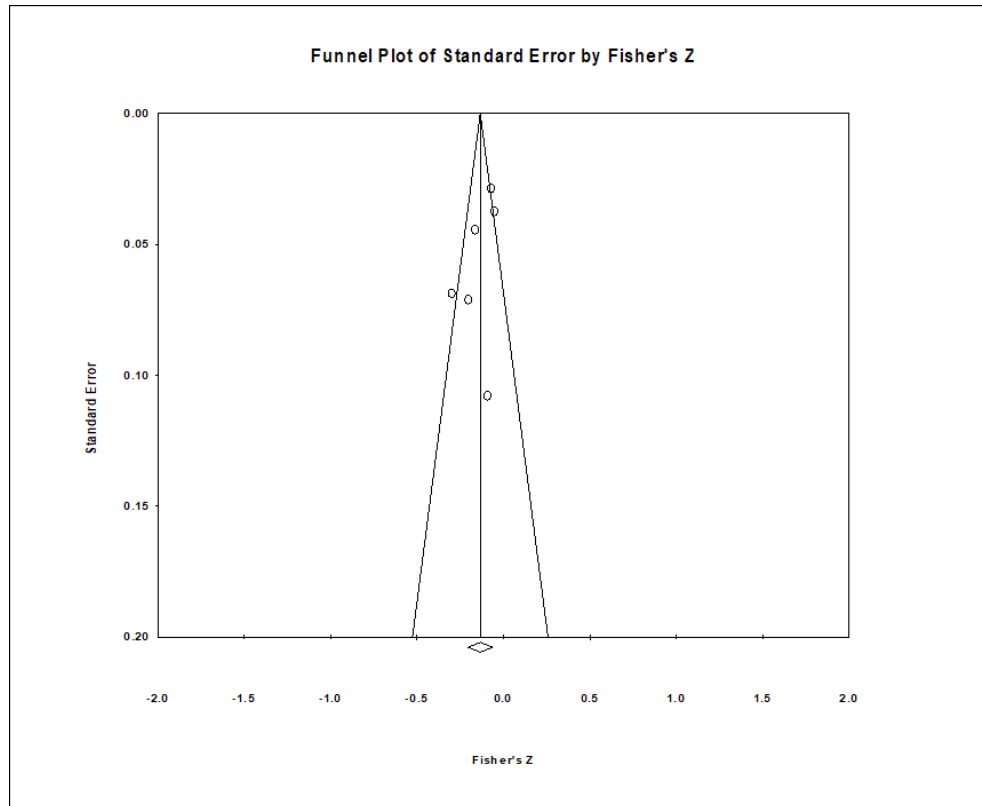

**Figure S2.** Funnel plot showing high publication bias for meta-analysis of the association between ACE and resilience using dichotomous outcomes.

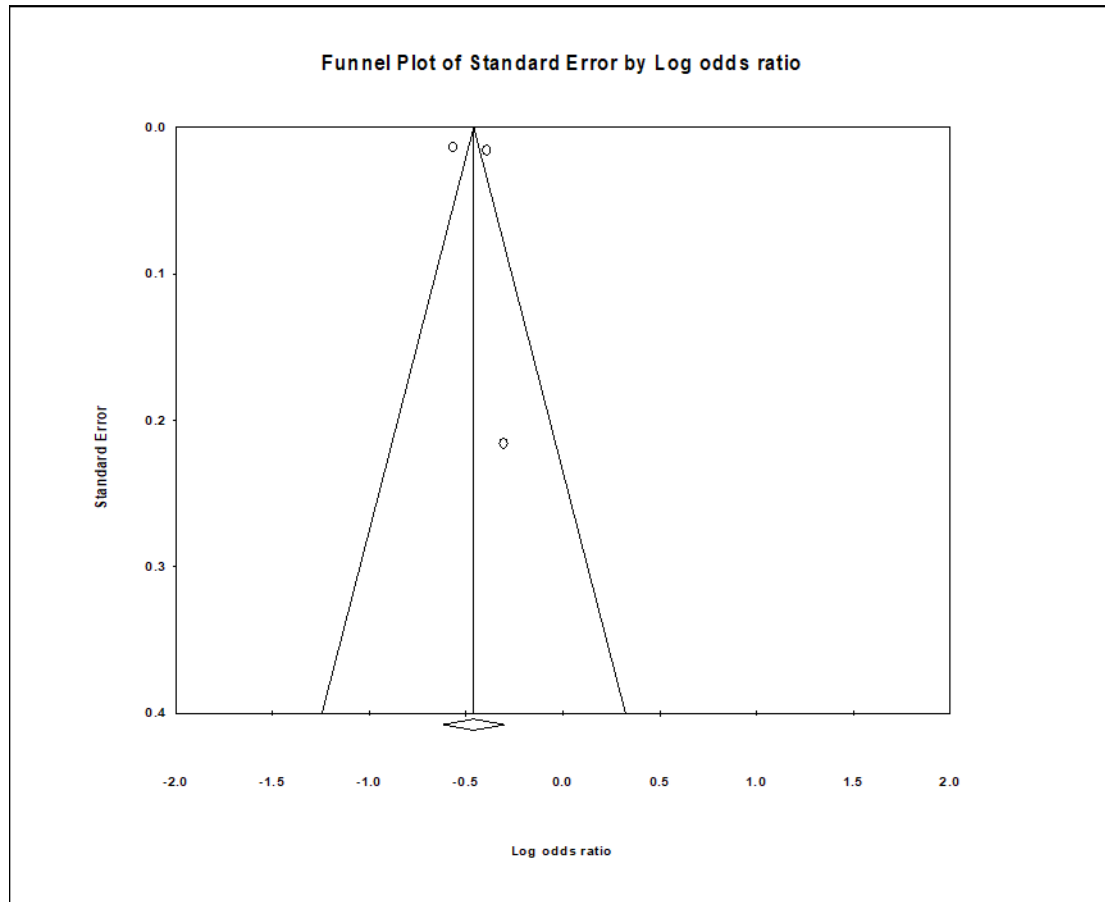

Supplement: s1 [file s1]
